# Supplementary material for: Pre-diagnostic body mass index and weight change in relation to colorectal cancer survival among incident cases from a population-based cohort study
Source: Springer Nature journal article supplement (doi:10.1186/s12885-016-2445-4), 2016-07-07
Supplement: MOESM1 [file 10348892]

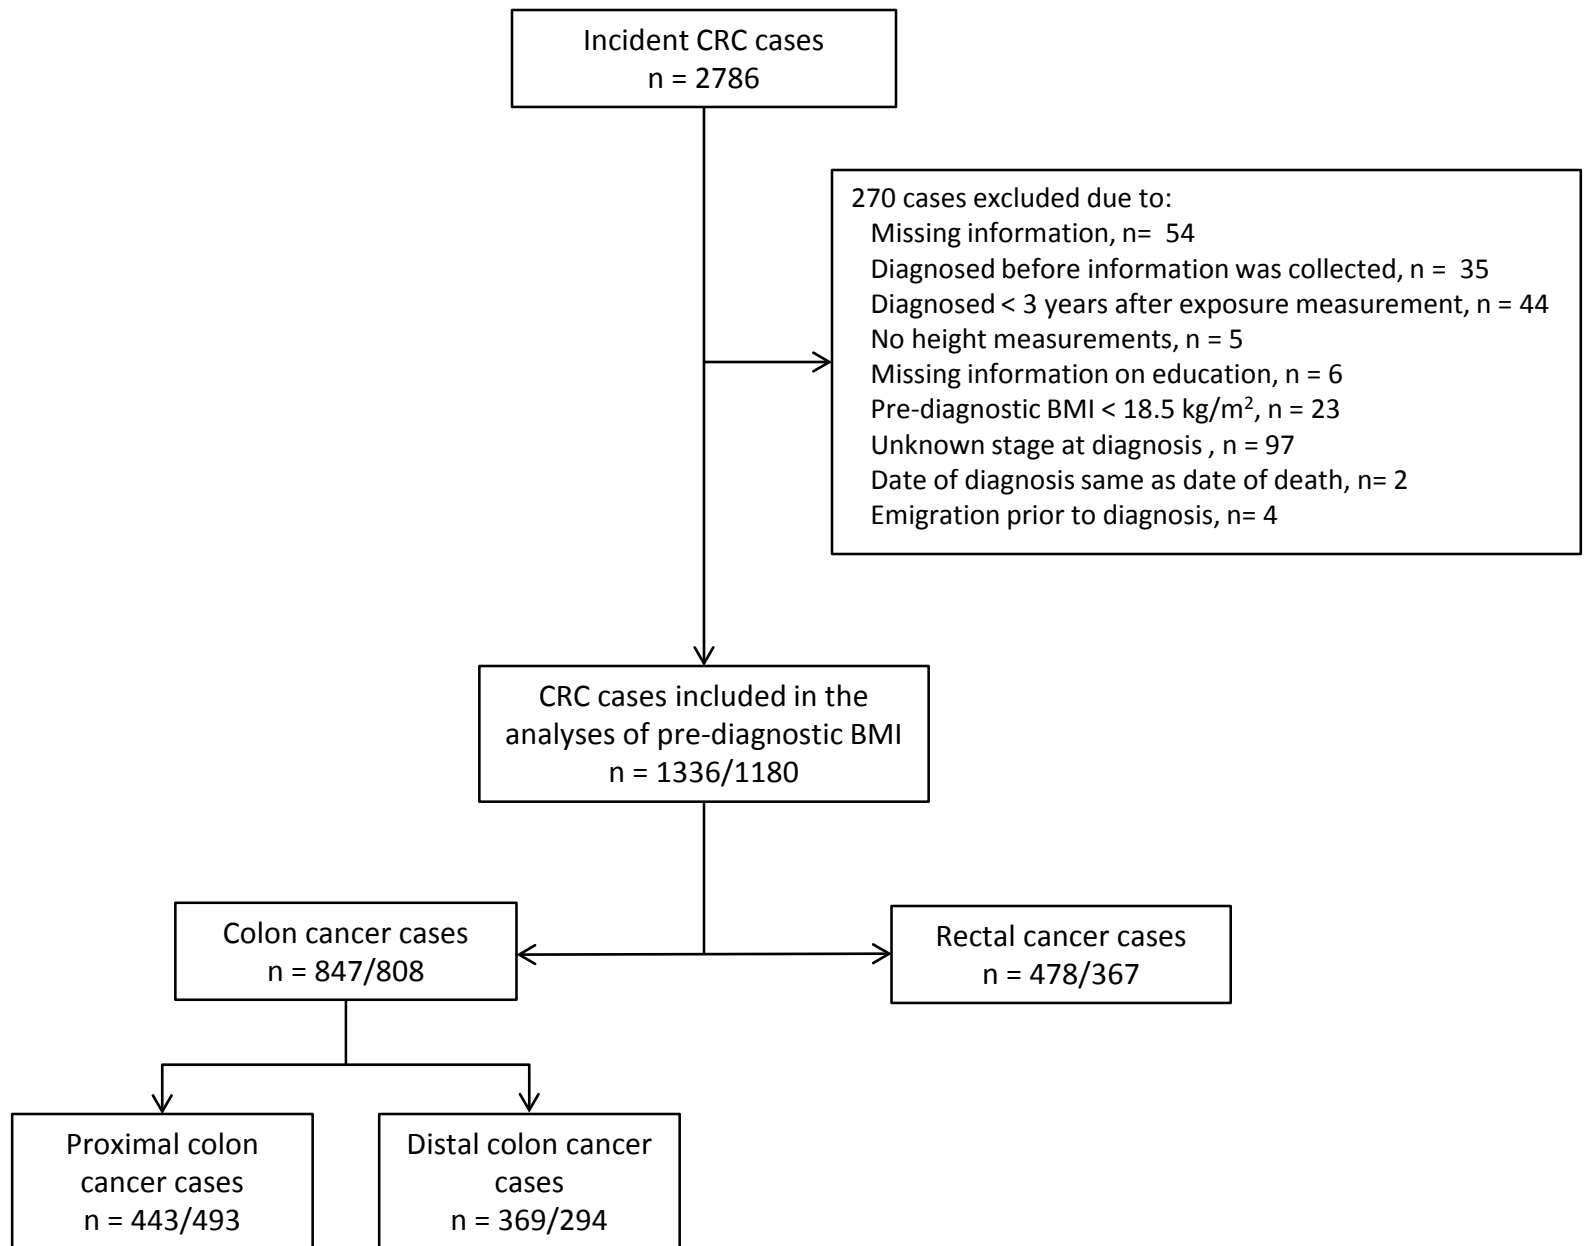

Figure S1: Flow chart illustrating number of cases in each colorectal cancer (CRC) subsite, BMI study sample (n = men/women)
