# Supplementary material for: Pre-diagnostic body mass index and weight change in relation to colorectal cancer survival among incident cases from a population-based cohort study
Source: Springer Nature journal article supplement (doi:10.1186/s12885-016-2445-4), 2016-07-07
Supplement: MOESM3 [file 10348892]

**Table S1: Hazard ratios and 95% confidence intervals for all-cause mortality by BMI**

|                                       | BMI (kg/m <sup>2</sup> ) |                   |                   |                         | P <sub>trend</sub> * |
|---------------------------------------|--------------------------|-------------------|-------------------|-------------------------|----------------------|
|                                       | 18.5–24.9                | 25–29.9           | ≥ 30              | Per 5 kg/m <sup>2</sup> |                      |
| <b>MEN</b>                            |                          |                   |                   |                         |                      |
| <b>CRC, n = 1336</b>                  |                          |                   |                   |                         |                      |
| Person-years                          | 3320                     | 3563              | 710               |                         |                      |
| Number of all-cause deaths            | 269                      | 348               | 86                |                         |                      |
| HR (95% CI)†                          | 1 (Ref)                  | 1.01 (0.86, 1.19) | 1.29 (1.00, 1.66) | 1.11 (0.99, 1.24)       | 0.09                 |
| <b>Colon cancer, n = 847</b>          |                          |                   |                   |                         |                      |
| Person-years                          | 1936                     | 2144              | 433               |                         |                      |
| Number of all-cause deaths            | 176                      | 212               | 58                |                         |                      |
| HR (95% CI)†                          | 1 (Ref)                  | 0.98 (0.79, 1.20) | 1.44 (1.06, 1.96) | 1.15 (0.99, 1.33)       | 0.07                 |
| <b>Proximal colon cancer, n = 443</b> |                          |                   |                   |                         |                      |
| Person-years                          | 1072                     | 1058              | 160               |                         |                      |
| Number of all-cause deaths            | 92                       | 103               | 26                |                         |                      |
| HR (95% CI)†                          | 1 (Ref)                  | 0.99 (0.73, 1.34) | 1.77 (1.12, 2.81) | 1.21 (0.97, 1.50)       | 0.09                 |
| <b>Distal colon cancer, n = 369</b>   |                          |                   |                   |                         |                      |
| Person-years                          | 848                      | 996               | 272               |                         |                      |
| Number of all-cause deaths            | 73                       | 94                | 30                |                         |                      |
| HR (95% CI)†                          | 1 (Ref)                  | 1.01 (0.73, 1.38) | 1.27 (0.81, 1.99) | 1.15 (0.93, 1.44)       | 0.20                 |
| <b>Rectal cancer, n = 478</b>         |                          |                   |                   |                         |                      |
| Person-years                          | 1374                     | 1371              | 273               |                         |                      |
| Number of all-cause deaths            | 92                       | 134               | 26                |                         |                      |
| HR (95% CI)†                          | 1 (Ref)                  | 1.17 (0.88, 1.54) | 1.10 (0.69, 1.74) | 1.08 (0.89, 1.31)       | 0.43                 |
| <b>WOMEN</b>                          |                          |                   |                   |                         |                      |
| <b>CRC, n= 1180</b>                   |                          |                   |                   |                         |                      |
| Person-years                          | 3793                     | 2175              | 1064              |                         |                      |
| Number of all-cause deaths            | 281                      | 172               | 90                |                         |                      |
| HR (95% CI)†                          | 1 (Ref)                  | 1.05 (0.86, 1.29) | 1.21 (0.95, 1.56) | 1.04 (0.94, 1.15)       | 0.49                 |
| <b>Colon cancer, n = 808</b>          |                          |                   |                   |                         |                      |
| Person-years                          | 2469                     | 1386              | 760               |                         |                      |
| Number of all-cause deaths            | 188                      | 113               | 58                |                         |                      |
| HR (95% CI)†                          | 1 (Ref)                  | 1.01 (0.79, 1.29) | 1.15 (0.85, 1.57) | 1.03 (0.90, 1.17)       | 0.69                 |
| <b>Proximal colon cancer, n = 493</b> |                          |                   |                   |                         |                      |
| Person-years                          | 1279                     | 876               | 372               |                         |                      |
| Number of all-cause deaths            | 115                      | 71                | 34                |                         |                      |
| HR (95% CI)†                          | 1 (Ref)                  | 0.97 (0.71, 1.33) | 1.21 (0.81, 1.80) | 1.05 (0.90, 1.24)       | 0.52                 |

(Continued on following page)

**Supplementary table 1: Hazard ratios and 95% confidence intervals for all-cause mortality by BMI**  
(continued)

|                                     | BMI (kg/m <sup>2</sup> ) |                   |                   | Per 5 kg/m <sup>2</sup> | P <sub>trend</sub> * |
|-------------------------------------|--------------------------|-------------------|-------------------|-------------------------|----------------------|
|                                     | 18.5–24.9                | 25–29.9           | ≥ 30              |                         |                      |
| <b>Distal colon cancer, n = 294</b> |                          |                   |                   |                         |                      |
| Person-years                        | 1160                     | 467               | 369               |                         |                      |
| Number of all-cause deaths          | 67                       | 39                | 20                |                         |                      |
| HR (95% CI)†                        | 1 (Ref)                  | 1.23 (0.81, 1.87) | 1.08 (0.62, 1.86) | 1.02 (0.82, 1.28)       | 0.83                 |
| <b>Rectal cancer, n = 367</b>       |                          |                   |                   |                         |                      |
| Person-years                        | 1271                     | 788               | 283               |                         |                      |
| Number of all-cause deaths          | 93                       | 58                | 31                |                         |                      |
| HR (95% CI)†                        | 1 (Ref)                  | 1.24 (0.87, 1.78) | 1.62 (1.01, 2.60) | 1.13 (0.93, 1.37)       | 0.21                 |

\* Wald P-value for BMI as continuous variable.

† Stratified Cox model (stage: localized, regional, or distant). Adjustment for age at diagnosis, year of diagnosis (< 1990, 1990–1994, 1995–1999, 2000–2004, ≥ 2005), smoking (never, former, or current), physical activity level (sedentary, moderately active, or active), education (≤ 9, 10–12, or ≥ 13 years).
