# Supplementary material for: Pre-diagnostic body mass index and weight change in relation to colorectal cancer survival among incident cases from a population-based cohort study
Source: Springer Nature journal article supplement (doi:10.1186/s12885-016-2445-4), 2016-07-07
Supplement: MOESM4 [file 10348892]

**Table S2: Hazard ratios and 95% confidence intervals for all-cause mortality by weight change**

|                                       | Weight change (kg) |          |                   |                   | Per 5 kg          | P <sub>trend</sub> |
|---------------------------------------|--------------------|----------|-------------------|-------------------|-------------------|--------------------|
|                                       | ≤ -2               | -1.9–1.9 | 2.0–7.9           | ≥ 8.0             |                   |                    |
| <b>MEN</b>                            |                    |          |                   |                   |                   |                    |
| <b>CRC, n = 999</b>                   |                    |          |                   |                   |                   |                    |
| Person-years                          | 836                | 1844     | 2240              | 694               |                   |                    |
| Number of all-cause deaths            | 97                 | 158      | 204               | 74                |                   |                    |
| HR (95% CI)‡                          | 1.20 (0.93, 1.56)  | 1 (Ref)  | 0.99 (0.80, 1.23) | 0.99 (0.74, 1.33) | 1.05 (0.92, 1.19) | 0.46               |
| <b>Colon cancer, n = 637</b>          |                    |          |                   |                   |                   |                    |
| Person-years                          | 505                | 1043     | 1454              | 360               |                   |                    |
| Number of all-cause deaths            | 58                 | 103      | 129               | 46                |                   |                    |
| HR (95% CI)‡                          | 0.98 (0.70, 1.37)  | 1 (Ref)  | 0.83 (0.63, 1.09) | 0.99 (0.69, 1.44) | 1.03 (0.86, 1.22) | 0.76               |
| <b>Proximal colon cancer, n = 339</b> |                    |          |                   |                   |                   |                    |
| Person-years                          | 304                | 438      | 833               | 120               |                   |                    |
| Number of all-cause deaths            | 25                 | 53       | 68                | 26                |                   |                    |
| HR (95% CI)‡                          | 0.64 (0.38, 1.06)  | 1 (Ref)  | 0.65 (0.44, 0.95) | 0.92 (0.53, 1.59) | 0.90 (0.68, 1.19) | 0.47               |
| <b>Distal colon cancer, n = 270</b>   |                    |          |                   |                   |                   |                    |
| Person-years                          | 195                | 576      | 575               | 224               |                   |                    |
| Number of all-cause deaths            | 27                 | 44       | 53                | 18                |                   |                    |
| HR (95% CI)‡                          | 1.38 (0.81, 2.34)  | 1 (Ref)  | 1.02 (0.66, 1.55) | 1.09 (0.61, 1.95) | 1.15 (0.89, 1.49) | 0.27               |
| <b>Rectal cancer, n = 351</b>         |                    |          |                   |                   |                   |                    |
| Person-years                          | 330                | 798      | 737               | 325               |                   |                    |
| Number of all-cause deaths            | 38                 | 55       | 72                | 27                |                   |                    |
| HR (95% CI)‡                          | 1.62 (1.04, 2.51)  | 1 (Ref)  | 1.32 (0.91, 1.91) | 0.93 (0.56, 1.55) | 1.03 (0.85, 1.26) | 0.76               |
| <b>WOMEN</b>                          |                    |          |                   |                   |                   |                    |
| <b>CRC, n = 895</b>                   |                    |          |                   |                   |                   |                    |
| Person-years                          | 1049               | 1562     | 2034              | 646               |                   |                    |
| Number of all-cause deaths            | 98                 | 121      | 147               | 48                |                   |                    |
| HR (95% CI)‡                          | 1.12 (0.84, 1.48)  | 1 (Ref)  | 1.17 (0.91, 1.49) | 1.16 (0.82, 1.64) | 1.10 (0.96, 1.26) | 0.17               |
| <b>Colon cancer, n = 608</b>          |                    |          |                   |                   |                   |                    |
| Person-years                          | 670                | 1124     | 1270              | 473               |                   |                    |
| Number of all-cause deaths            | 68                 | 69       | 99                | 34                |                   |                    |
| HR (95% CI)‡                          | 1.44 (1.01, 2.05)  | 1 (Ref)  | 1.37 (1.00, 1.88) | 1.45 (0.95, 2.23) | 1.19 (1.02, 1.39) | 0.03               |
| <b>Proximal colon cancer, n = 383</b> |                    |          |                   |                   |                   |                    |
| Person-years                          | 423                | 673      | 645               | 247               |                   |                    |
| Number of all-cause deaths            | 46                 | 46       | 58                | 22                |                   |                    |
| HR (95% CI)‡                          | 1.27 (0.82, 1.97)  | 1 (Ref)  | 1.26 (0.85, 1.87) | 1.44 (0.85, 2.45) | 1.18 (0.98, 1.43) | 0.09               |

(Continued on following page)

**Supplementary table 2: Hazard ratios and 95% confidence intervals for all-cause mortality by weight change (continued)**

|                                     | Weight change (kg) |          |                   |                   | Per 5 kg*         | P <sub>trend</sub> † |
|-------------------------------------|--------------------|----------|-------------------|-------------------|-------------------|----------------------|
|                                     | ≤ -2               | -1.9–1.9 | 2.0–7.9           | ≥ 8.0             |                   |                      |
| <b>Distal colon cancer, n = 207</b> |                    |          |                   |                   |                   |                      |
| Person-years                        | 231                | 449      | 579               | 197               |                   |                      |
| Number of all-cause deaths          | 20                 | 21       | 35                | 12                |                   |                      |
| HR (95% CI) ‡                       | 1.97 (1.00, 3.88)  | 1 (Ref)  | 1.62 (0.88, 2.97) | 2.53 (1.13, 5.68) | 1.34 (0.99, 1.82) | 0.06                 |
| <b>Rectal cancer, n = 283</b>       |                    |          |                   |                   |                   |                      |
| Person-years                        | 379                | 438      | 721               | 173               |                   |                      |
| Number of all-cause deaths          | 30                 | 51       | 47                | 14                |                   |                      |
| HR (95% CI) ‡                       | 0.74 (0.45, 1.21)  | 1 (Ref)  | 0.91 (0.58, 1.42) | 0.96 (0.51, 1.79) | 0.95 (0.70, 1.28) | 0.72                 |

\* Analyses restricted to cases who maintained or gained weight.

† Wald P-value for weight gain as continuous variable.

‡ Stratified Cox model (stage: localized, regional, or distant). Adjustment for age at diagnosis, year of diagnosis (<1990, 1990-1994, 1995–1999, 2000–2004, ≥ 2005), smoking (never, former, or current), physical activity level (sedentary, moderately active, or active), education (≤ 9, 10-12, or ≥ 13 years), and initial BMI (continuous).
